# Supplementary material for: Gene Variant in the NF-κB Pathway Inhibitor NFKBIA Distinguishes Patients with Psoriatic Arthritis within the Spectrum of Psoriatic Disease
Source: Hindawi journal article supplement (doi:10.1155/2019/1030256), 2019-11-11
Supplement: f1 [file 1030256.f1.pdf]

**Supplementary table 1.** Primers and PCR conditions for genotyping the three NFkB pathway gene variants.

The *NFKB1* and *NFKBIA* variants were genotyped through polymerase chain reaction (PCR) amplification of genomic DNA with specific primer-pairs followed by digestion with a restriction enzyme (PCR-RFLP) and electrophoresis on agarose gels to visualise the different alleles.

The *NFKBIZ* rs3217713 is a 23 nt insertion/deletion (indel) polymorphism that was previously associated with the risk of Psor. The PCRs were electrophoresed on agarose gels to visualise the two indel alleles.

| <b>PCR-PRIMERS,<br/>Forward / reverse</b>                                                       | <b>Restriction<br/>Enzyme</b> | <b>Allele size<br/>Base pairs</b>          |
|-------------------------------------------------------------------------------------------------|-------------------------------|--------------------------------------------|
| <i>NFKB1</i> rs230526 A/G<br>5' ATG TCT GTA GTC CCT GCT GAA CC<br>5' GGA GCG AAG GCA ACC CGT AC | <b>TaqI</b>                   | <b>A: 670 bp</b><br><b>G: 390 + 280 bp</b> |
| <i>NFKBIA</i> rs7152376 A/G<br>5' GGA GGT CAG GGT GCT CTT AGG<br>5' AGG GAG ATA GGG GAC CTG CAG | <b>SmaI</b>                   | <b>A: 509 bp</b><br><b>G: 339 + 170 bp</b> |
| <i>NFKBIZ</i> rs3217713<br>5' AGGATCGCAAAAGTGGCCGCACAG<br>5' ATGAATTATCAGACATCAG GAAGGGGG       | <b>None</b>                   | <b>Ins: 230 bp</b><br><b>Del: 207 bp</b>   |
